# Supplementary material
Source: PubMed Central journal article supplement (PMC4340335)
Supplement: Supp_Fig1.pdf [file Supp_Fig1.pdf]

The Case Manager will administer the inventory by reading the statement and marking the responses.

Choose the number that best represents how often the statement describes your feelings.

- 0 - Never**
- 1 - Rarely**
- 2 - Sometimes**
- 3 - Quite Frequently**
- 4 - Nearly Always**

**Client Name** \_\_\_\_\_  
**Caregiver Name** \_\_\_\_\_ **Date** \_\_\_\_\_

| <b>Time Dependency Items</b>                      |         |
|---------------------------------------------------|---------|
| He/she needs my help to perform many daily tasks  | ① ② ③ ④ |
| He/she is dependent on me                         | ① ② ③ ④ |
| I have to watch him/her constantly                | ① ② ③ ④ |
| I have to help him/her with many basic functions  | ① ② ③ ④ |
| I don't have a minute's break from his/her chores | ① ② ③ ④ |

| <b>Development Items</b>                                           |         |
|--------------------------------------------------------------------|---------|
| He/she needs my help to perform many daily tasks                   | ① ② ③ ④ |
| I feel that I am missing out on life                               | ① ② ③ ④ |
| I wish I could escape from this situation                          | ① ② ③ ④ |
| My social life has suffered                                        | ① ② ③ ④ |
| I feel emotionally drained due to caring for him/her               | ① ② ③ ④ |
| I expected that things would be different at this point in my life | ① ② ③ ④ |

| <b>Physical Health Items</b>            |         |
|-----------------------------------------|---------|
| I'm not getting enough sleep            | ① ② ③ ④ |
| My health has suffered                  | ① ② ③ ④ |
| Care giving has made me physically sick | ① ② ③ ④ |
| I'm physically tired                    | ① ② ③ ④ |

| <b>Emotional Health Items</b>                   |         |
|-------------------------------------------------|---------|
| I feel embarrassed over his/her behavior        | ① ② ③ ④ |
| I feel ashamed of him/her                       | ① ② ③ ④ |
| I resent him/her                                | ① ② ③ ④ |
| I feel uncomfortable when I have friends over   | ① ② ③ ④ |
| I feel angry about my interactions with him/her | ① ② ③ ④ |

**SUPPLEMENTARY FIG. S2.** The Caregiver Burden Inventory.

| <b>Social Relationships Items</b>                                      |           |
|------------------------------------------------------------------------|-----------|
| I don't get along with other family members as well as I used to       | ① ① ② ③ ④ |
| My care giving efforts aren't appreciated by others in my family       | ① ① ② ③ ④ |
| I've had problems with my marriage (or other significant relationship) | ① ① ② ③ ④ |
| I don't get along as well as I used to with others                     | ① ① ② ③ ④ |
| I feel resentful of other relatives who could but do not help          | ① ① ② ③ ④ |

|                     |
|---------------------|
| <b>Total Score:</b> |
|---------------------|

**Scores near or above 36 indicates a greater need for respite and other services.**

It is important to seriously look at any item on the burden scale where the answer was scored as a 3 or 4 ('quite frequently' or 'nearly always'). If you have a 3 or 4 as an answer, give careful thought about why the caregiver scored so high on the question and see if you can find a way to reduce the stress.

**Comments:** \_\_\_\_\_  
 \_\_\_\_\_  
 \_\_\_\_\_  
 \_\_\_\_\_  
 \_\_\_\_\_
