# Supplementary material
Source: PubMed Central journal article supplement (PMC4340335)
Supplement: Supp_Table1.pdf [file Supp_Table1.pdf]

## Supplementary Data

| <b>PANS IMPAIRMENT SCORE</b>                                                                                                                                                                                                                                                                                                                                                                  |           |
|-----------------------------------------------------------------------------------------------------------------------------------------------------------------------------------------------------------------------------------------------------------------------------------------------------------------------------------------------------------------------------------------------|-----------|
| <b>NONE</b>                                                                                                                                                                                                                                                                                                                                                                                   | <b>0</b>  |
| <b>MINIMAL</b> Symptoms associated with <b>minimal</b> difficulties in self-esteem, family life, social acceptance, or school or job functioning (infrequent upset or concern about tics <i>vis a vis</i> the future, periodic, slight increase in family tensions because of symptoms; friends or acquaintances may occasionally notice or comment about symptoms in an upsetting way).      | <b>10</b> |
| <b>MILD</b> Symptoms associated with <b>mild</b> difficulties in self-esteem, family life, social acceptance, or school functioning.                                                                                                                                                                                                                                                          | <b>20</b> |
| <b>MODERATE</b> Symptoms associated with <b>moderate</b> problems in self-esteem family life, social acceptance, or school or job functioning (episodes of dysphoria, periodic distress and upheaval in the family, frequent teasing by peers or episodic social avoidance, periodic interference in school performance because of PANS symptoms).                                            | <b>30</b> |
| <b>SEVERE</b> Symptoms associated with <b>severe</b> difficulties in self-esteem, family life, social acceptance, or school functioning.                                                                                                                                                                                                                                                      | <b>40</b> |
| <b>EXTREME</b> Symptoms associated with <b>extreme</b> difficulties in self-esteem, family life, social acceptance, or school functioning (severe depression with suicidal ideation, disruption of the family (separation/divorce, residential placement), disruption of social ties - severely restricted life because of social stigma and social avoidance, unable to attend school, etc). | <b>50</b> |

\*The PANS Impairment Score was developed for the National Institute of Mental Health Intravenous Immunoglobulin for PANDAS clinical trial (NCT01281969) (Leckman, Swedo, et al, manuscript in process). This scoring system is based on the clinical experience of Susan Swedo, M.D., Paul Grant, M.D., Miroslav Kovacevic, M.D., Beth Latimer, M.D., and James Leckman, M.D., with the help of Diana Pohlman, Keith Moore and many other parents.

**SUPPLEMENTARY FIG. S1.** Pediatric Acute-onset Neuropsychiatric Syndrome (PANS) Impairment Score. A continuous parent-rated scale of general impairment from PANS symptoms from 0 to 50.\*
